# Supplementary material for: Effect of Problem-based learning combined with Rain Classroom teaching based on outcome-based education on nursing students’ comprehensive abilities in burn unit: a quasi-experimental study
Source: Research Square preprint supplement (doi:10.21203/rs.3.rs-6530519/v1), 2025-06-11
Supplement: Supplementary file 1 [file 73424b9fea382a6b28dda2bb.docx]

**Table 1. Demographics of participants** (***n***, %)

| **Item** | **Control group (*n*=30)** | **Intervention** **group (*n*=30)** | ***T* value** | ***P* value** |
| --- | --- | --- | --- | --- |
| Age (years) | 22.10±1.09 | 22.63±1.25 | 1.762 | 0.083 |
| Sex |  |  | 0.75 | 0.456 |
| Female | 27（90.00） | 25（83.30） |  |  |
| Male | 3（10.00） | 5（16.70） |  |  |
| Educational background |  |  | 0.776 | 0.441 |
| Junior college | 19（63.30） | 16（53.30） |  |  |
| Undergraduate college | 11（36.70） | 14（46.70） |  |  |
