# Supplementary material for: Effect of Problem-based learning combined with Rain Classroom teaching based on outcome-based education on nursing students’ comprehensive abilities in burn unit: a quasi-experimental study
Source: Research Square preprint supplement (doi:10.21203/rs.3.rs-6530519/v1), 2025-06-11
Supplement: Supplementary file 2 [file 9cfcad5fde0fd18ebe437aba.docx]

**Table 2. Comparison** **between theoretical and operational assessment scores**

**(points, M±SD*)**

| **Group** | **Theoretical knowledge score** | **Clinical practice skills score** |
| --- | --- | --- |
| Control group (*n*=30) | 89.23±3.51 | 88.67±2.95 |
| Intervention group (*n*=30) | 92.03±3.24 | 90.60±3.14 |
| *T* value | 3.209 | 2.459 |
| *P* value | 0.002 | 0.017 |

*Data are expressed as means and standard deviations (SDs)
