# Supplementary material for: Effect of Problem-based learning combined with Rain Classroom teaching based on outcome-based education on nursing students’ comprehensive abilities in burn unit: a quasi-experimental study
Source: Research Square preprint supplement (doi:10.21203/rs.3.rs-6530519/v1), 2025-06-11
Supplement: Supplementary file 3 [file b299c1554a5f86a75e7bda8e.docx]

**Table 4. Comparison of nursing students' evaluation of teaching effectiveness (points, M±SD*)**

| **Item** | **Control group (*n*=30)** | **Intervention group (*n*=30)** | ***T* value** | ***P* value** |
| --- | --- | --- | --- | --- |
| Teaching satisfaction | 3.57±0.50 | 3.87±0.35 | 2.688 | 0.009 |
| Increase interest in learning | 3.50±0.51 | 3.97±0.18 | 4.731 | 0.000 |
| Increase classroom participation | 3.57±0.73 | 3.97±0.18 | 2.919 | 0.005 |
| Increase teacher-student interaction | 3.50±0.82 | 3.93±0.25 | 2.765 | 0.008 |
| Deepen memory of knowledge | 3.57±0.50 | 3.83±0.38 | 2.316 | 0.024 |
| Improve problem-solving skills | 3.37±0.56 | 3.73±0.45 | 2.808 | 0.007 |
| Improve independent learning skills | 3.67±0.76 | 3.77±0.43 | 0.628 | 0.532 |
| Cultivate critical thinking skills | 3.37±0.61 | 3.77±0.43 | 2.919 | 0.005 |
| Broaden one's knowledge | 3.60±0.62 | 3.83±0.38 | 1.756 | 0.084 |
| Enhance teamwork and communication skills | 3.53±0.63 | 3.73±0.45 | 1.417 | 0.162 |
| Develop the ability to integrate knowledge | 3.50±0.51 | 3.80±0.41 | 2.523 | 0.014 |
| Improve literature-searching skills | 3.53±0.57 | 3.80±0.41 | 2.082 | 0.042 |

*Data are expressed as means and standard deviations (SDs)
