# Supplementary material for: Effect of Problem-based learning combined with Rain Classroom teaching based on outcome-based education on nursing students’ comprehensive abilities in burn unit: a quasi-experimental study
Source: Research Square preprint supplement (doi:10.21203/rs.3.rs-6530519/v1), 2025-06-11
Supplement: Supplementary file 4 [file b4d3b3defce04aafc4130afd.docx]

**Table 3. Comparison of classroom performance (points, M±SD*)**

| **Group** | **Classroom participation** | **Communication ability** | **Material preparation** | **Critical thinking** | **Teamwork ability** |
| --- | --- | --- | --- | --- | --- |
| Control group (*n*=30) | 3.73±0.64 | 3.70±0.70 | 4.07±0.25 | 3.67±0.55 | 3.80±0.66 |
| Intervention group (n=30) | 4.20±0.48 | 4.27±0.52 | 4.20±0.48 | 4.07±0.69 | 4.17±0.70 |
| *T* value | 3.186 | 3.55 | 1.336 | 2.485 | 2.083 |
| *P* value | 0.002 | 0.001 | 0.187 | 0.016 | 0.042 |

*Data are expressed as means and standard deviations (SDs)
